# Supplementary material for: Temperature and Risk of Infectious Diarrhea: A Systematic Review and Meta-analysis
Source: Research Square preprint supplement (doi:10.21203/rs.3.rs-428042/v1), 2021-04-19
Supplement: Supplementary file 1 [file 406014d6d159399cba91c1dc.docx]

**PubMed**

Search: ((((((infectious diarrhea) OR (Cholera)) OR (bacillary dysentery)) OR (amoebic dysentery)) OR (typhoid fever)) OR (paratyphoid fever)) AND ((temperature) OR (ambient temperature)) Filters: from 1990/1/1 - 3000/12/12 Sort by: Most Recent

("dysentery"[MeSH Terms] OR "dysentery"[All Fields] OR ("infectious"[All Fields] AND "diarrhea"[All Fields]) OR "infectious diarrhea"[All Fields] OR ("cholera"[MeSH Terms] OR "cholera"[All Fields] OR "choleras"[All Fields] OR "cholera s"[All Fields] OR "cholerae"[All Fields] OR "cholerae s"[All Fields] OR "choleraic"[All Fields]) OR ("dysentery, bacillary"[MeSH Terms] OR ("dysentery"[All Fields] AND "bacillary"[All Fields]) OR "bacillary dysentery"[All Fields] OR ("bacillary"[All Fields] AND "dysentery"[All Fields])) OR ("amoebic dysentery"[All Fields] OR "dysentery, amebic"[MeSH Terms] OR ("dysentery"[All Fields] AND "amebic"[All Fields]) OR "amebic dysentery"[All Fields] OR ("amebic"[All Fields] AND "dysentery"[All Fields])) OR ("typhoid fever"[MeSH Terms] OR ("typhoid"[All Fields] AND "fever"[All Fields]) OR "typhoid fever"[All Fields]) OR ("paratyphoid fever"[MeSH Terms] OR ("paratyphoid"[All Fields] AND "fever"[All Fields]) OR "paratyphoid fever"[All Fields])) AND ("temperature"[MeSH Terms] OR "temperature"[All Fields] OR "temperatures"[All Fields] OR "temperature s"[All Fields] OR (("ambient"[All Fields] OR "ambients"[All Fields]) AND ("temperature"[MeSH Terms] OR "temperature"[All Fields] OR "temperatures"[All Fields] OR "temperature s"[All Fields])))

Translations

infectious diarrhea: "dysentery"[MeSH Terms] OR "dysentery"[All Fields] OR ("infectious"[All Fields] AND "diarrhea"[All Fields]) OR "infectious diarrhea"[All Fields]

Cholera: "cholera"[MeSH Terms] OR "cholera"[All Fields] OR "choleras"[All Fields] OR "cholera's"[All Fields] OR "cholerae"[All Fields] OR "cholerae's"[All Fields] OR "choleraic"[All Fields]

bacillary dysentery: "dysentery, bacillary"[MeSH Terms] OR ("dysentery"[All Fields] AND "bacillary"[All Fields]) OR "bacillary dysentery"[All Fields] OR ("bacillary"[All Fields] AND "dysentery"[All Fields])

amoebic dysentery: "amoebic dysentery"[All Fields] OR "dysentery, amebic"[MeSH Terms] OR ("dysentery"[All Fields] AND "amebic"[All Fields]) OR "amebic dysentery"[All Fields] OR ("amebic"[All Fields] AND "dysentery"[All Fields])

typhoid fever: "typhoid fever"[MeSH Terms] OR ("typhoid"[All Fields] AND "fever"[All Fields]) OR "typhoid fever"[All Fields]

paratyphoid fever: "paratyphoid fever"[MeSH Terms] OR ("paratyphoid"[All Fields] AND "fever"[All Fields]) OR "paratyphoid fever"[All Fields]

temperature: "temperature"[MeSH Terms] OR "temperature"[All Fields] OR "temperatures"[All Fields] OR "temperature's"[All Fields]

ambient: "ambient"[All Fields] OR "ambients"[All Fields]

temperature: "temperature"[MeSH Terms] OR "temperature"[All Fields] OR "temperatures"[All Fields] OR "temperature's"[All Fields]

**Web of Science**

| # 5 | [**2,045**](http://apps.webofknowledge.com/summary.do?product=UA&doc=1&qid=5&SID=8DqjyMsPWlcnrHX1Ob7&search_mode=CombineSearches&update_back2search_link_param=yes) | #4 AND #3  *数据库= WOS, KJD, MEDLINE, RSCI, SCIELO 时间跨度=1990-2020*  *检索语言=自动* |  |  |
| --- | --- | --- | --- | --- |
| 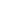 | | | | |
| # 4 | [**2,873,249**](http://apps.webofknowledge.com/summary.do?product=UA&doc=1&qid=4&SID=8DqjyMsPWlcnrHX1Ob7&search_mode=GeneralSearch&update_back2search_link_param=yes) | **主题:** (ambient temperature) *OR* **主题:** (temperature)  *数据库= WOS, KJD, MEDLINE, RSCI, SCIELO 时间跨度=1990-2020*  *检索语言=自动* |  |  |
| 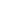 | | | | |
| # 3 | [**59,412**](http://apps.webofknowledge.com/summary.do?product=UA&doc=1&qid=3&SID=8DqjyMsPWlcnrHX1Ob7&search_mode=GeneralSearch&update_back2search_link_param=yes) | **主题:** (Infectious diarrhea) *OR* **主题:** (Cholera) *OR* **主题:** (dysentery) *OR* **主题:** (typhoid) *OR* **主题:** (paratyphoid) |  |  |

**Cochrane Library**

infectious diarrhea in Title Abstract Keyword AND temperature in Title Abstract Keyword - (Word variations have been searched)

**Chinese National Knowledge Infrastructure (CNKI)**

( ( ( ( ( ( 主题%='传染性腹泻' or 题名%='传染性腹泻' or title='传染性腹泻' or v_subject='传染性腹泻' ) OR ( 主题%='霍乱' or 题名%='霍乱' or title='霍乱' or v_subject='霍乱' ) OR ( 主题%='细菌性痢疾' or 题名%='细菌性痢疾' or title='细菌性痢疾' or v_subject=细菌性痢疾' ) OR( 主题%='阿米巴痢疾' or 题名%='阿米巴痢疾' or title='阿米巴痢疾' or v_subject='阿米巴痢疾' ) OR ( 主题%='“伤寒”' or 题名%='“伤寒”' or title='“伤寒”' or v_subject='“伤寒”' ) OR ( 主题%='“副伤寒”' or 题名%='“副伤寒”' or title='“副伤寒”' or v_subject='“副伤寒”' )

AND ( 主题%='温度' or 题名%='温度' or title='温度' or v_subject='温度' ) OR ( 主题%='霍乱' or 题名%='霍乱' or title='霍乱' or v_subject='霍乱' )

资源范围:总库；时间范围：发表时间:1990-01-01到2020-12-12

**VIP (Chinese) database,**

（“传染性腹泻”OR“霍乱”OR“细菌性痢疾”OR“阿米巴痢疾”OR“伤寒”OR“副伤寒”））AND（“温度”）

**Chinese BioMedical Literature Database (CBM)**

（“传染性腹泻”OR“霍乱”OR“细菌性痢疾”OR“阿米巴痢疾”OR“伤寒”OR“副伤寒”））AND（“温度”）
